# Supplementary material
Source: MDPI journal article supplement (https://www.mdpi.com/2073-4395/11/4/661)
Supplement: s1 [file s1]

Supplementary 1: Quality control and filtering of transcriptome raw reads of *Cosmos caudatus*.

| Sample | Raw        |                | Clean                 |                          | Low Quality reads   |
|--------|------------|----------------|-----------------------|--------------------------|---------------------|
|        | Read       | Base           | Reads                 | Basepair                 |                     |
| Root   | 74,771,394 | 11,290,480,494 | 68,120,202<br>(91.1%) | 9,603,267,314<br>(85.1%) | 5,981,224<br>(8.0%) |
| Flower | 65,620,134 | 9,908,640,234  | 60,354,324<br>(92.0%) | 8,278,022,640<br>(83.5%) | 4,675,834<br>(7.1%) |
| Leaf   | 59,686,746 | 9,012,698,646  | 55,512,786<br>(93.0%) | 7,404,105,961<br>(82.2%) | 3,619,694<br>(6.1%) |
| Stem   | 63,085,464 | 9,525,905,064  | 58,986,400<br>(93.5%) | 8,007,932,148<br>(84.1%) | 3,732,000<br>(5.9%) |

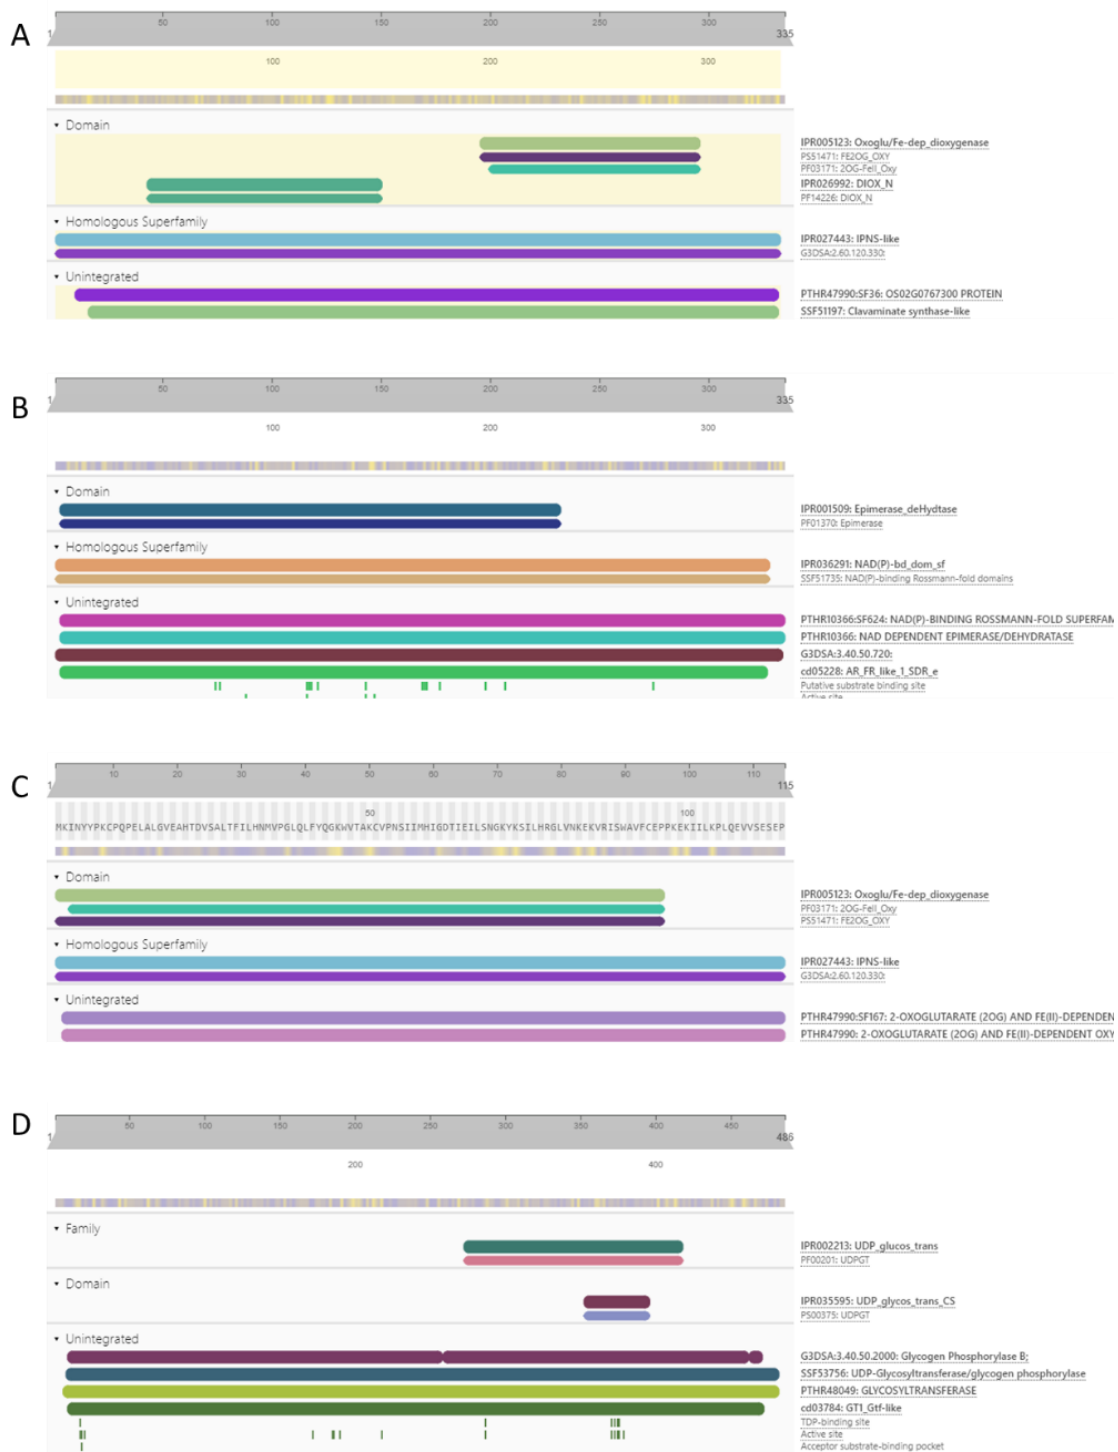

Supplementary 4: Domain Search Using Interproscan Software. A) F3H; B) DFR; C) LDOX; D) UFGT.
