# Supplementary material
Source: MDPI journal article supplement (https://www.mdpi.com/2073-4395/11/4/661)

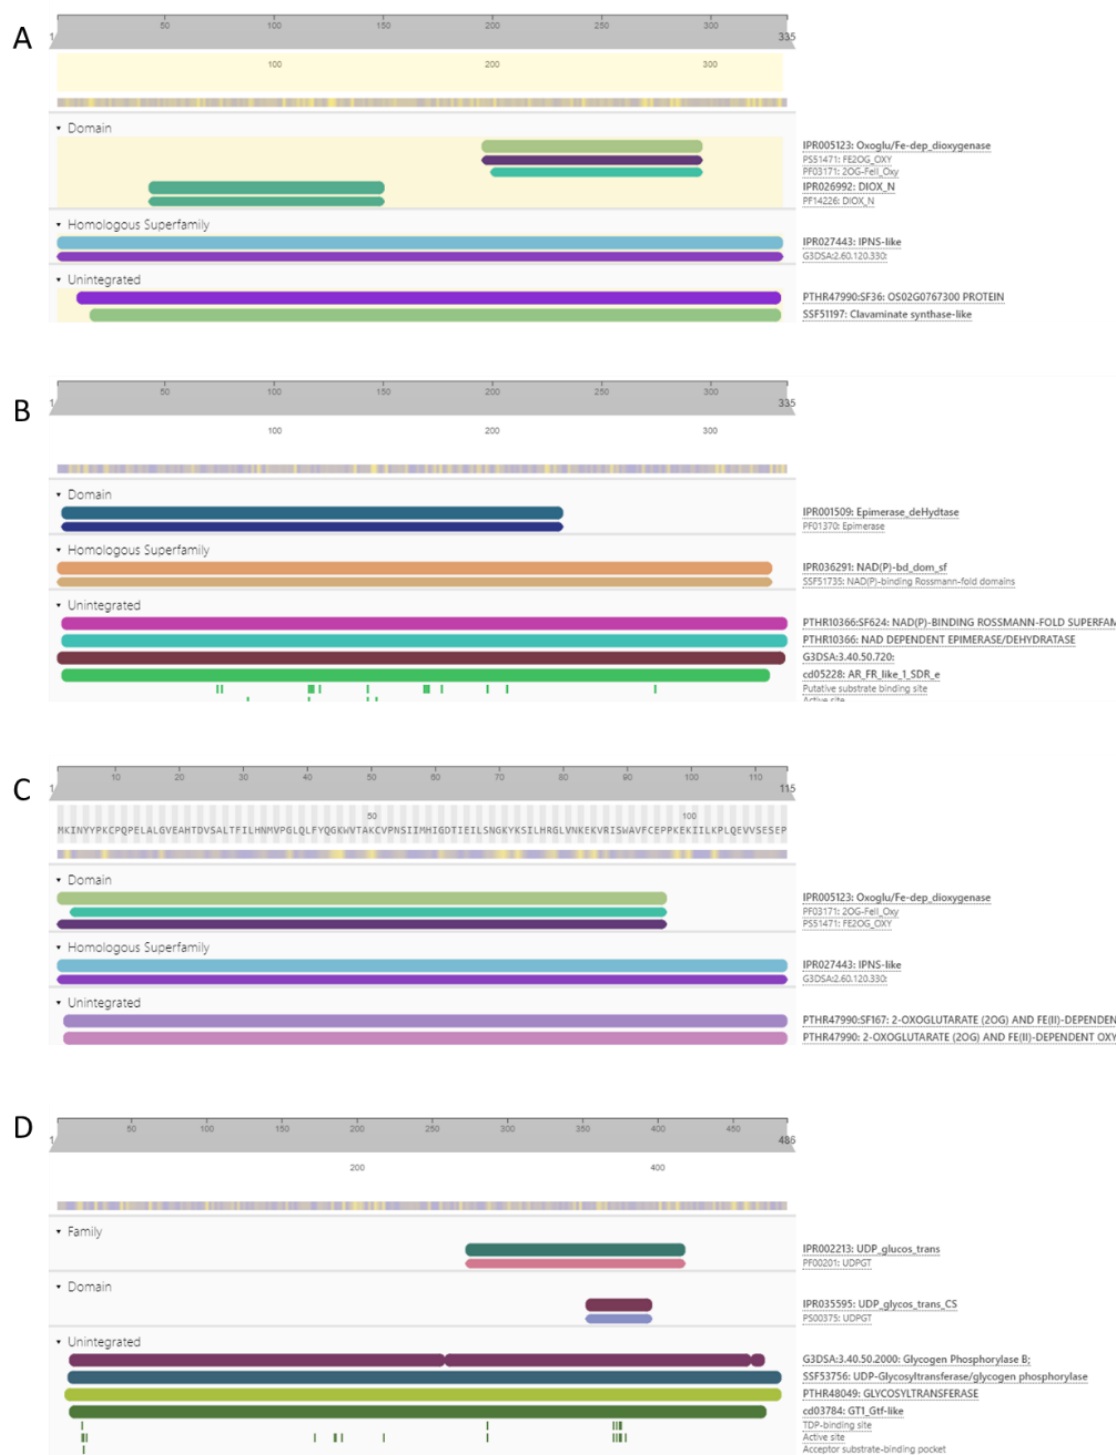

Supplementary 4: Domain Search Using Interproscan Software. A)F3H; B) DFR; C) LDOX; D) UFGT.

Supplement: s1 [file s1]
